# Supplementary material for: Insights into the Gut Microbial Communities of Broiler Chicken Fed Black Soldier Fly Larvae-Desmodium-Based Meal as a Dietary Protein Source
Source: MDPI journal article supplement (doi:10.3390/microorganisms10071351), 2022-07-05
Supplement: s1 [file s1]

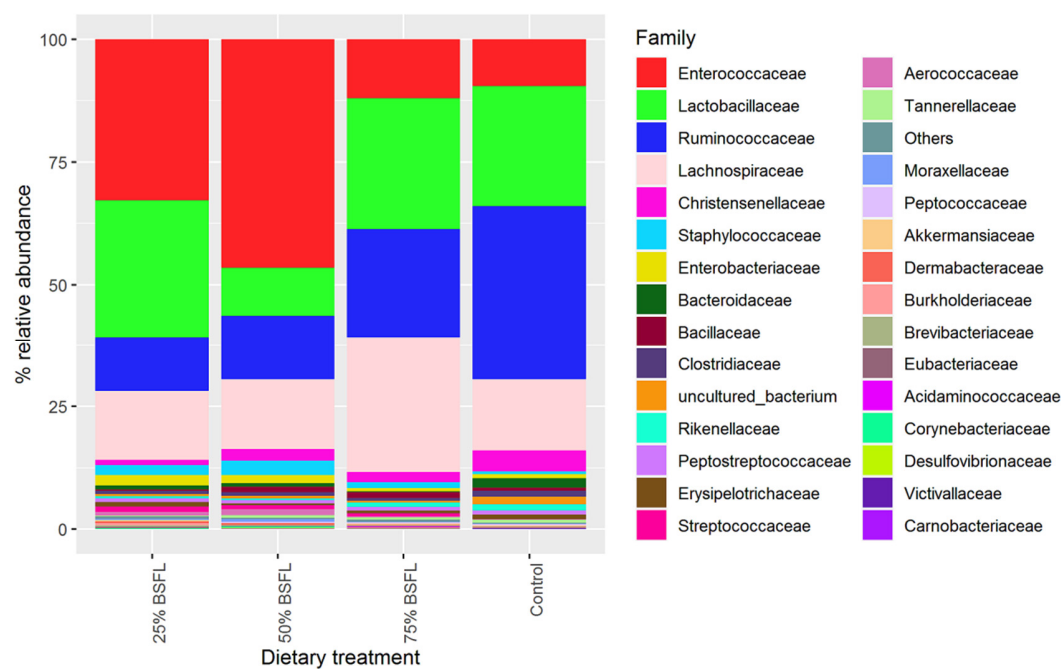

**Figure S1: Cumulative relative composition of bacteria Operational Taxonomic Units at family level observed across the different dietary treatments. The top 30 families with high abundance were selected.**

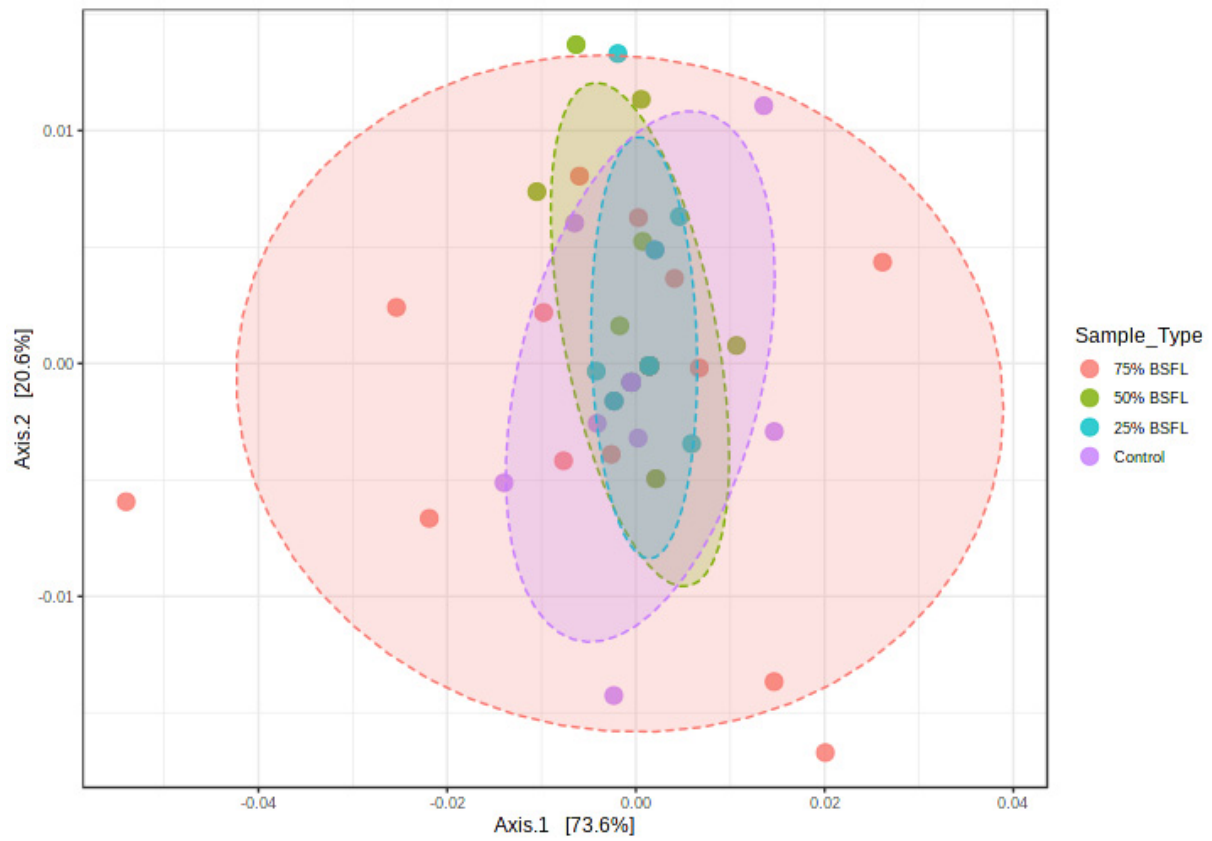

**Figure S2: Beta diversity PCoA plot based on Unifrac distance between the different dietary treatments. [PERMANOVA]  
R-Squared: 0.049; P-value > 0.001**
